# Supplementary material for: Bulk and Single-Cell Transcriptomics Identify Tobacco-Use Disparity in Lung Gene Expression of ACE2, the Receptor of 2019-nCov
Source: Preprints.org preprint supplement (doi:10.20944/preprints202002.0051.v3), 2020-03-02
Supplement: Supplementary file 1 [file supplementary]

**Bulk and single-cell transcriptomics identify tobacco-use disparity  
in lung gene expression of ACE2, the receptor of 2019-nCov**

Guoshuai Cai

Department of Environmental Health Sciences, Arnold School of Public Health, University of  
South Carolina, Columbia, SC 29208

Address for Correspondence:

Guoshuai Cai  
Department of Environmental Health Sciences  
Arnold School of Public Health  
University of South Carolina  
915 Greene Street  
Discovery 517  
Columbia, SC 29204  
GCAI@mailbox.sc.edu  
Phone: 803-777-4120

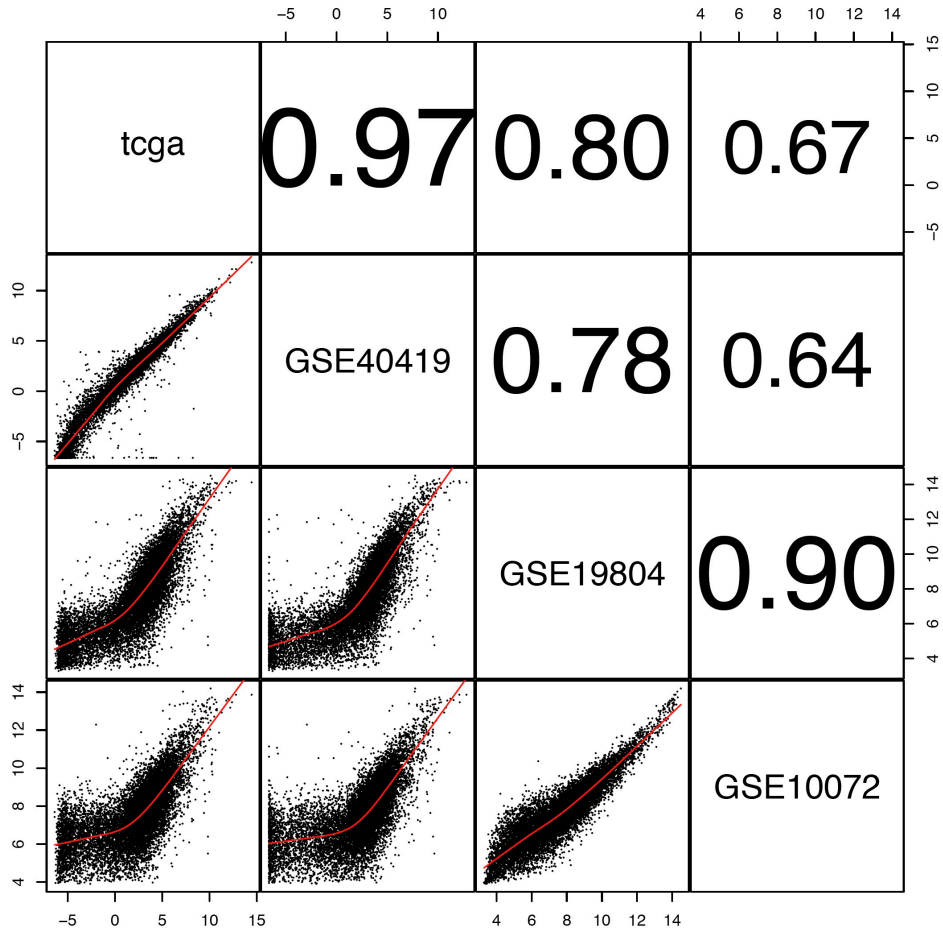

**Figure S1. Correlation of four datasets.**

Lower panel shows pairwise scatter plots of data mean across samples in each dataset.

Upper panel shows their corresponding Pearson correlation coefficients.

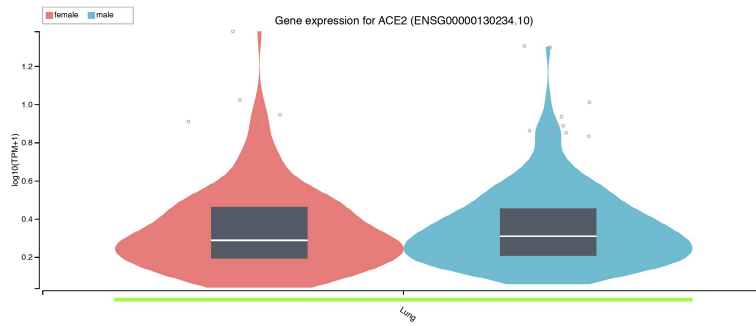

**Figure S2. ACE2 gene expression in GTEx female and male lung tissues.** y-axis shows the log<sub>10</sub> scaled RNA-seq Transcript Per Million (TPM) values.

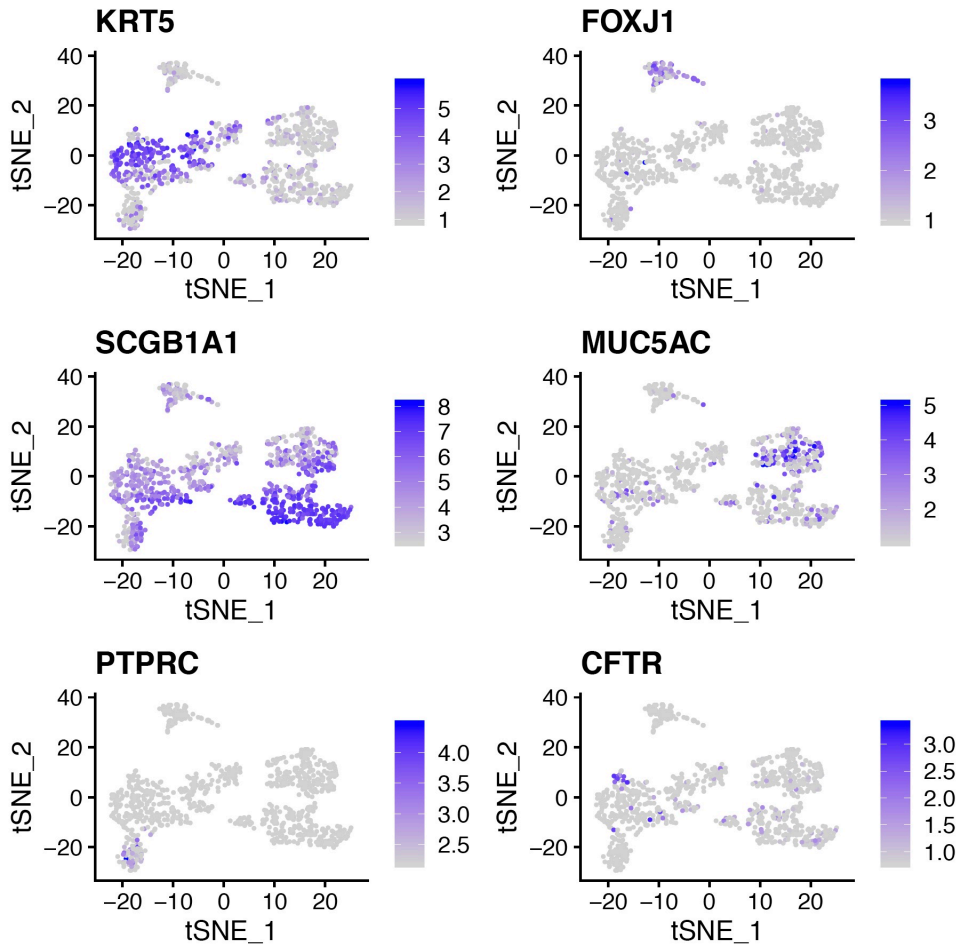

**Figure S3. Expression profile of bronchial epithelium cell markers.**

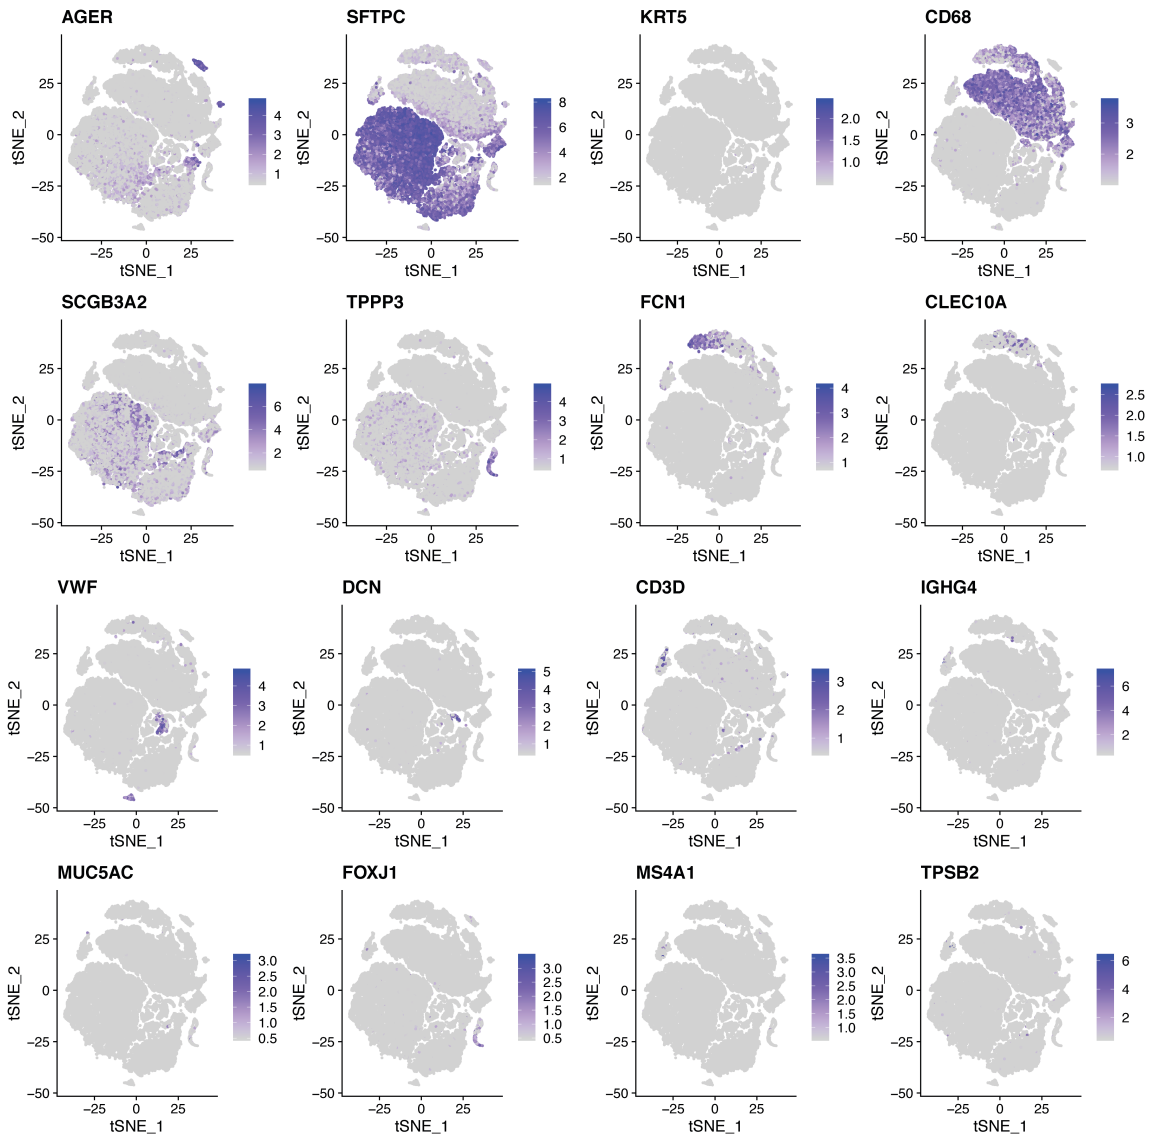

**Figure S4. Expression profile of lung tissue cell markers.**

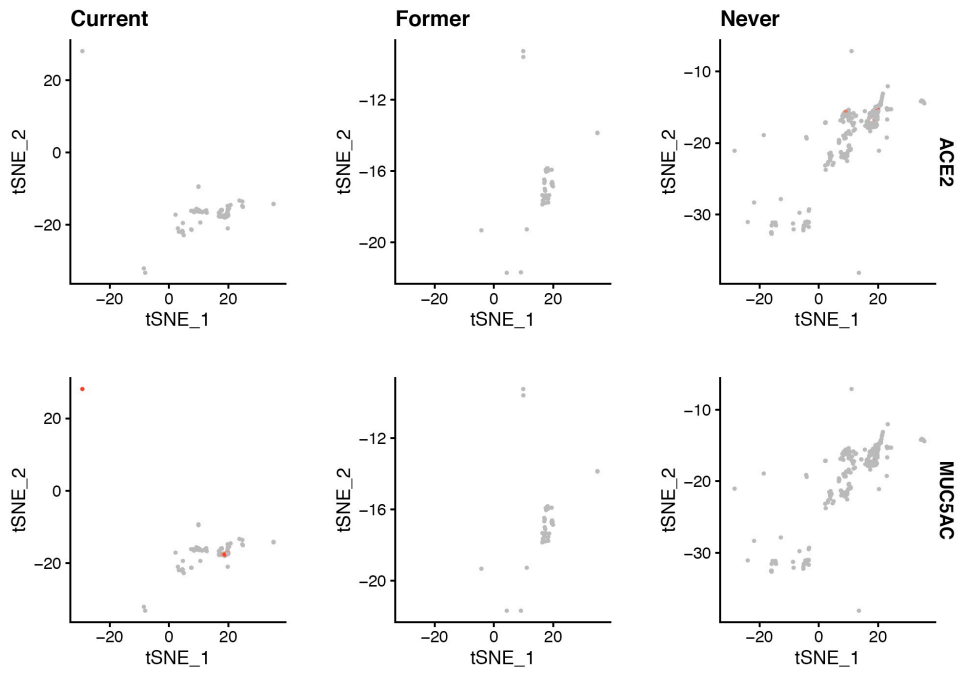

**Figure S5. Expression profile of *MUSC5AC* (top) and *ACE2* (bottom).**
